# Supplementary material for: Exploring the Effect of Functional Diets Containing Phytobiotic Compounds in Whiteleg Shrimp Health: Resistance to Acute Hepatopancreatic Necrotic Disease Caused by Vibrio parahaemolyticus
Source: MDPI journal article supplement (doi:10.3390/ani13081354), 2023-04-15
Supplement: s1 [file s1]

**Table S1. Bacterial strains used in this study.**

| Strain                     | Species                        | Origin                    | <i>pirA/ pirB</i><br>genes | Reference                      |
|----------------------------|--------------------------------|---------------------------|----------------------------|--------------------------------|
| <i>Vp</i> <sub>AHPND</sub> | <i>Vibrio parahaemolyticus</i> | Diseased shrimp (Taiwan)  | +                          | [18]                           |
| <i>Vp</i> lab1             | <i>V. parahaemolyticus</i>     | Diseased shrimp (Ecuador) | +                          | Lab collection (not published) |
| <i>Vp</i> lab2             | <i>V. parahaemolyticus</i>     | Diseased shrimp (Vietnam) | +                          | Lab collection (not published) |
| CECT 8407                  | <i>V. parahaemolyticus</i>     | Diseased shrimp (Mexico)  | -                          | [64]                           |
| <i>Valg</i> lab1           | <i>V. alginolyticus</i>        | Healthy European seabass  | -                          | Lab collection (not published) |
| CECT 8408                  | <i>V. harveyi</i>              | Lesion of shrimp (Mexico) | -                          | [65]                           |
| CECT 4999                  | <i>V. vulnificus</i>           | Diseased eel (Spain)      | -                          | [66]                           |

**Table S2. Primers tested for *Vibrio parahaemolyticus* qPCR optimization.**

| Target gene | Primer  | Primer sequence (5' - 3') | Reference |
|-------------|---------|---------------------------|-----------|
| <i>tlh</i>  | Tlh_F3  | GCTACTCGAAAGATGATCC       | [67]      |
|             | Tlh_LB  | TAGATTCGAACGAGA           |           |
| <i>tdh</i>  | D3      | CCACTACCACTCTCATATGC      | [68]      |
|             | D5      | GGTACTAAATGGCTGACATC      |           |
| <i>tlh</i>  | Tlh-Fw  | AACTTCTGCGCCCGAAGAG       | [69]      |
|             | Tlh-Rv  | CGGTGGATGTCCAAACAAGGA     |           |
| <i>tdh</i>  | Tdh-Fe  | GTAAAGGTCTCTGACTTTTGGAC   | [67]      |
|             | Tdh-Rv  | CTACAGAATCATAGGAATGTTGAAG |           |
| <i>trh</i>  | Trh-Fw  | CCATCAATACCTTTTCCTTCTCC   | [67]      |
|             | Trh-Rv  | ACCGTCATATAGGCGCTTAAC     |           |
| <i>pirA</i> | PirA-Fw | TTGGACTGTCGAACCAAACG      | [50]      |
|             | PirA-Rv | GCACCCCATTTGGTATTGAATG    |           |
| <i>tlh</i>  | VPF     | AACCGTGGCGTTCCAGAA        | [49]      |
|             | VPR     | CCGTCAAACGAATCAGTGCTT     |           |

**Table S3. Detection of *Vibrio parahaemolyticus* strains by qPCR assay comparing PirA-Fw/PirA-Rv and VPF/VPR primer pairs.**

| <i>V. parahaemolyticus</i> strain | CT (qPCR PirA-Fw/PirA-Rv) | CT (qPCR VPF/VPR) |
|-----------------------------------|---------------------------|-------------------|
| <i>Vp</i> <sub>AHPND</sub>        | 14.89                     | 12.32             |
| <i>Vp</i> lab1                    | 17.82                     | 14.81             |
| <i>Vp</i> lab2                    | 16.31                     | 14.42             |
| CECT 8407                         | 34.56                     | 15.44             |

## References

- [18] Lee, C.; Chen, I.T.; Yang, Y.T.; Ko, T.P.; Huang, Y.T.; Huang, J.Y.; Huang, M.F.; Lin, S.J.; Chen, C.Y.; Lin, S.S.; Lightner, D.V.; Wang, H.C.; Wang, A.H.J.; Wang, H.C.; Hor, L.I.; Lo, C.F. The opportunistic marine pathogen

*Vibrio parahaemolyticus* becomes virulent by acquiring a plasmid that expresses a deadly toxin. *PNAS*, **2015**, 112 (34), 10798–10803. doi: 10.1073/pnas.1503129112.

- [49] Park, J.Y.; Jeon, S.; Kim, J.Y.; Park, M.; Kim, S. Multiplex Real-time Polymerase Chain Reaction Assays for Simultaneous Detection of *Vibrio cholerae*, *Vibrio parahaemolyticus*, and *Vibrio vulnificus*. *Os Pub Health Res Pers*, **2013**, 4 (3), 133–139. doi: 10.1016/j.phrp.2013.04.004.
- [50] Han, J.E.; Tang, K.F.J.; Tran, L.H.; Lightner D.V. Phototransducing insect-related (Pir) toxin-like genes in a plasmid of *Vibrio parahaemolyticus*, the causative agent of acute hepatopancreatic necrosis disease (AHPND) of shrimp. *Dis Aquat Org*, **2015**, 1 (113), 33–40. doi: 10.3354/dao02830.
- [64] Roque, A.; Turnbull, J.F.; Escalante, G.; Gomez-Gil, B.; Alday-Sanz, M.V. Development of a bath challenge for the marine shrimp *Penaeus vannamei* Boone, 1931. *Aquaculture*, **1998**, 169, 283–290. doi: 10.1016/S0044-8486(98)00370-6.
- [65] Soto-Rodriguez, S.A.; Gomez-Gil, B.; Lozano, R.; del Rio-Rodríguez, R.; Diéguez, A.L.; Romalde, J.L. Virulence of *Vibrio harveyi* responsible for the "Bright-red" Syndrome in the Pacific white shrimp *Litopenaeus vannamei*. *J Invertebr Pathol*. **2012**, 109 (3), 307–317. doi: 10.1016/j.jip.2012.01.006.
- [66] Lee, C.T.; Amaro, C.; Wu, K.M.; Valiente, E.; Chang, Y.F.; Tsai, S.F.; Chang, C.H.; Hor, L.I. A common virulence plasmid in biotype 2 *Vibrio vulnificus* and its dissemination aided by a conjugal plasmid. *J. Bacteriol*. **2008**, 190, 1638–1648. doi: 10.1128/JB.01484-07.
- [67] Wang, H.; Tang, X.; Su, Y.C.; Chen, J.; Yan, J. Characterization of clinical *Vibrio parahaemolyticus* strains in Zhoushan, China, from 2013 to 2014. *PLoS ONE*. **2017**, 12 (7), e0180335. doi: 10.1371/journal.pone.0180335
- [68] Yamazaki, W.; Kumeda, Y.; Misawa, N.; Nakaguchi, Y.; Nishibuchi, M. Development of a loop-mediated isothermal amplification assay for sensitive and rapid detection of the *tdh* and *trh* genes of *Vibrio parahaemolyticus* and related *Vibrio* species. *Appl Environ Microbiol*. **2010**, 76 (3), 820–828. doi: 10.1128/AEM.02284-09.
- [69] Kaufman, G.E.; Blackstone, G.M.; Vickery, M.C.; Bej, A.K.; Bowers, J. Bowen, M.D.; Meyer, R.F. DePaola, A. Real-time PCR quantification of *Vibrio parahaemolyticus* in oysters using an alternative matrix. *J Food Prot*. **2004**, 67 (11), 2424–2429. doi: 10.4315/0362-028x-67.11.2424.
